# Supplementary material for: Hypoxia-directed tumor targeting of CRISPR/Cas9 and HSV-TK suicide gene therapy using lipid nanoparticles
Source: bioRxiv or medRxiv preprint supplement (doi:10.1101/2021.09.30.462477), 2021-09-30
Supplement: Supplementary file [file media-2.pdf]

**Supplemental Table 1: List of Plasmids used in this study**

| Name                  | Source        | Information                                                                                                                                                                                      |
|-----------------------|---------------|--------------------------------------------------------------------------------------------------------------------------------------------------------------------------------------------------|
| 5HRE/GFP              | Addgene 46926 | Used to PCR out the 5xHRE promoter using oligos HRE1-2 and cloned using NEBuilder® HiFi DNA Assembly into JDS246 (NotI/MluI digested) and pcDNA3-luciferase (HindIII/MluI digested)              |
| pRRIsinPGK_BFP2_WPRE  | Addgene 91787 | Used to PCR out the hPGK promoter using oligos PGK1-2 and cloned using NEBuilder® HiFi DNA Assembly into JDS246 (NotI/MluI digested) and pcDNA3-luciferase (HindIII/MluI digested)               |
| pcDNA3-ffluc          | This lab      | Expresses firefly luciferase from a CMV promoter.                                                                                                                                                |
| pcDNA3-ffluc-shortODD | This lab      | Expresses firefly luciferase short ODD fusion protein driven from a CMV promoter.                                                                                                                |
| pcDNA3-ffluc-longODD  | This lab      | Expresses firefly luciferase long ODD fusion protein driven from a CMV promoter.                                                                                                                 |
| PGK-ffluc             | This lab      | Expresses firefly luciferase from a PGK promoter.                                                                                                                                                |
| PGK-ffluc-shortODD    | This lab      | Expresses firefly luciferase short ODD fusion protein driven from a PGK promoter.                                                                                                                |
| PGK-ffluc-longODD     | This lab      | Expresses firefly luciferase long ODD fusion protein driven from a PGK promoter.                                                                                                                 |
| 5HRE-ffluc            | This lab      | Expresses firefly luciferase from a 5HRE promoter.                                                                                                                                               |
| 5HRE-ffluc-shortODD   | This lab      | Expresses firefly luciferase short ODD fusion protein driven from a 5HRE promoter.                                                                                                               |
| 5HRE-ffluc-longODD    | This lab      | Expresses firefly luciferase long ODD fusion protein driven from a 5HRE promoter.                                                                                                                |
| pAL119-TK             | Addgene 21911 | CMV driven HSV-TK                                                                                                                                                                                |
| CMV-HSV-tk-mut30      | This lab      | Expresses HSV-tk mutant 30 (L159I, I160L, F161A, A168Y, L169F) from a CMV promoter                                                                                                               |
| 5HRE-HSV-tk           | This lab      | 5HRE driven HSV-TK                                                                                                                                                                               |
| 5HRE-HSV-tk-mut30     | This lab      | Expresses HSV-tk mutant 30 (L159I, I160L, F161A, A168Y, L169F) from a 5HRE promoter                                                                                                              |
| 3XFLAG-Cas9           | This lab      | Expresses Cas9 nuclease with N-terminal 3X FLAG from CBh promoter (CMV early enhancer; ch-beta actin promoter; chimeric ch-beta actin MVM intron). Does not contain any gRNA or fluorescent tag. |
| 5HRE-Cas9             | This lab      | 5HRE driven expression of spCas9. Does not contain any gRNA or fluorescent tag.                                                                                                                  |
| eGFP gRNA             | This lab      | Expresses "GACGTAGCCTTCGGGCATGG" gRNA for spCas9 targeting eGFP from a H1 promoter                                                                                                               |
| AluY gRNA             | This lab      | Expresses "ACCTGTAGTCCCAGCTACTC " gRNA for spCas9 targeting AluY repeats from a H1 promoter                                                                                                      |
| PLK1 gRNA-1           | This lab      | Expresses "ACCTCGGGAGCTATGTAATT " gRNA for spCas9 targeting PLK1 gene from a H1 promoter                                                                                                         |
| PLK1 gRNA-2           | This lab      | Expresses "CGACTTCGTGTTCTGGTGT " gRNA for spCas9 targeting PLK1 gene from a H1 promoter                                                                                                          |
| PLK1 gRNA-3           | This lab      | Expresses "TGCTGCTCAAGCCGCACCAG " gRNA for spCas9 targeting PLK1 gene from a H1 promoter. Best candidate that was used in all Cas9 experiments in Fig. 3-4                                       |
| CBh-Cas9 BbsI gRNA    | This lab      | Expresses Cas9 from a CBh promoter, in addition to "GACGTAGCCTTCGGGCATGG" gRNA for spCas9 targeting eGFP from a U6 promoter                                                                      |
| CBh-Cas9 AluY gRNA    | This lab      | Expresses Cas9 from a CBh promoter, in addition to "ACCTGTAGTCCCAGCTACTC " gRNA for spCas9 targeting AluY repeats from a U6 promoter                                                             |
| CBh-Cas9 PLK1 gRNA    | This lab      | Expresses Cas9 from a CBh promoter, in addition to "TGCTGCTCAAGCCGCACCAG " gRNA for spCas9 targeting PLK1 gene from a U6 promoter                                                                |
| HRE-Cas9 BbsI gRNA    | This lab      | Expresses Cas9 from an HRE promoter, in addition to "GACGTAGCCTTCGGGCATGG" gRNA for spCas9 targeting eGFP from a U6 promoter                                                                     |
| HRE-Cas9 AluY gRNA    | This lab      | Expresses Cas9 from an HRE promoter, in addition to "ACCTGTAGTCCCAGCTACTC " gRNA for spCas9 targeting AluY repeats from a U6 promoter                                                            |
| HRE-Cas9 PLK1 gRNA    | This lab      | Expresses Cas9 from an HRE promoter, in addition to "TGCTGCTCAAGCCGCACCAG " gRNA for spCas9 targeting PLK1 gene from a U6 promoter                                                               |

|                           |               |                                                                                                                             |
|---------------------------|---------------|-----------------------------------------------------------------------------------------------------------------------------|
| pLenti-EF1a-GFP-ffluc-BSR | This lab      | Third generation lentiviral packaging construct expressing GFP, ffluc and blasticidin resistance gene from an EF1a promoter |
| pMDLg/pRRE                | Addgene 12251 | 3rd generation lentiviral packaging plasmid; Contains Gag and Pol                                                           |
| pRSV-Rev                  | Addgene 12253 | 3rd generation lentiviral packaging plasmid; Contains Rev                                                                   |
| pMD2.G                    | Addgene 12259 | VSV-G envelope expressing plasmid                                                                                           |
